# Supplementary material for: Identification of Potential Genes Encoding Protein Transporters in Arabidopsis thaliana Glucosinolate (GSL) Metabolism
Source: MDPI journal article supplement (doi:10.3390/life12030326), 2022-02-22
Supplement: s1 [file s1]

**Supplementary Table S1.** List of known GSL genes identified from the literature, AraCyc, and KEGG.

| No. | TAIR_ID   | Uniprot ID | Gene name | Protein name                                                | Source     |        |      |
|-----|-----------|------------|-----------|-------------------------------------------------------------|------------|--------|------|
|     |           |            |           |                                                             | Literature | AraCyc | KEGG |
| 1   | AT1G16400 | Q9FUY7     | CYP79F2   | Hexahomomethionine N-hydroxylase                            | √          | √      | √    |
| 2   | AT1G16410 | Q949U1     | CYP79F1   | Dihomomethionine N-hydroxylase                              | √          | √      | √    |
| 3   | AT1G18590 | Q9FZ80     | SOT17     | Cytosolic sulfotransferase 17                               | √          | √      | √    |
| 4   | AT1G24100 | O48676     | UGT74B1   | UDP-glycosyltransferase 74B1                                | √          | √      | √    |
| 5   | AT1G74090 | Q9C9C9     | SOT18     | Cytosolic sulfotransferase 18                               | √          | √      | √    |
| 6   | AT1G74100 | Q9C9D0     | SOT16     | Cytosolic sulfotransferase 16                               | √          | √      | √    |
| 7   | AT2G20610 | Q9SIV0     | SUR1      | S-alkyl-thiohydroximate lyase SUR1                          | √          | √      | √    |
| 8   | AT2G22330 | Q501D8     | CYP79B3   | Tryptophan N-monooxygenase 2                                | √          | √      | √    |
| 9   | AT2G43100 | Q9ZW84     | IPMI2     | 3-isopropylmalate dehydratase small subunit 2               | √          | √      | √    |
| 10  | AT3G49680 | Q9M401     | BCAT3     | Branched-chain-amino-acid aminotransferase 3, chloroplastic | √          | √      | √    |
| 11  | AT3G58990 | Q9LYT7     | IPMI1     | 3-isopropylmalate dehydratase small subunit 3               | √          | √      | √    |
| 12  | AT4G13430 | Q94AR8     | IIL1      | 3-isopropylmalate dehydratase large subunit, chloroplastic  | √          | √      | √    |
| 13  | AT4G13770 | P48421     | CYP83A1   | Cytochrome P450 83A1                                        | √          | √      | √    |
| 14  | AT4G31500 | O65782     | CYP83B1   | Cytochrome P450 83B1                                        | √          | √      | √    |
| 15  | AT4G39950 | O81346     | CYP79B2   | Tryptophan N-monooxygenase 1                                | √          | √      | √    |
| 16  | AT5G05260 | Q9FLC8     | CYP79A2   | Phenylalanine N-monooxygenase                               | √          | √      | √    |
| 17  | AT5G14200 | Q9FMT1     | IMDH1     | 3-isopropylmalate dehydrogenase 1, chloroplastic            | √          | √      | √    |
| 18  | AT5G23010 | Q9FG67     | MAM1      | Methylthioalkylmalate synthase 1, chloroplastic             | √          | √      | √    |

|    |           |        |            |                                                        |   |   |   |
|----|-----------|--------|------------|--------------------------------------------------------|---|---|---|
| 19 | AT5G23020 | Q9FN52 | MAM3       | Methylthioalkylmalate synthase 3, chloroplastic        | √ | √ | √ |
| 20 | AT1G12140 | A8MRX0 | FMO GS-OX5 | Flavin-containing monooxygenase FMO GS-OX5             | √ | √ |   |
| 21 | AT1G21100 | Q9LPU5 | IGMT1      | Indole glucosinolate O-methyltransferase 1             | √ | √ |   |
| 22 | AT1G21120 | Q9LPU7 | IGMT2      | Indole glucosinolate O-methyltransferase 2             | √ | √ |   |
| 23 | AT1G47600 | Q8GRX1 | BGLU34     | Myrosinase 4                                           | √ | √ |   |
| 24 | AT1G51470 | Q3ECS3 | BGLU35     | Myrosinase 5                                           | √ | √ |   |
| 25 | AT1G54040 | Q8RY71 | ESP        | Epithiospecifier protein                               | √ | √ |   |
| 26 | AT1G58260 | Q9LQB7 | CYP79C2    | Cytochrome P450, putative                              | √ | √ |   |
| 27 | AT1G62540 | Q94K43 | FMO GS-OX2 | Flavin-containing monooxygenase FMO GS-OX2             | √ | √ |   |
| 28 | AT1G62560 | Q9SXE1 | FMO GS-OX3 | Flavin-containing monooxygenase FMO GS-OX3             | √ | √ |   |
| 29 | AT1G62570 | Q93Y23 | FMO GS-OX4 | Flavin-containing monooxygenase FMO GS-OX4             | √ | √ |   |
| 30 | AT1G65860 | Q9SS04 | FMO GS-OX1 | Flavin-containing monooxygenase FMO GS-OX1             | √ | √ |   |
| 31 | AT1G76790 | Q9SRD4 | IGMT5      | Indole glucosinolate O-methyltransferase 5             | √ | √ |   |
| 32 | AT1G79370 | F4IF38 | CYP79C1    | Cytochrome P450, family 79, subfamily C, polypeptide 1 | √ | √ |   |
| 33 | AT2G25450 | Q9SKK4 | GSL-OH     | Probable 2-oxoacid dependent dioxygenase               | √ | √ |   |
| 34 | AT2G33070 | O49326 | NSP2       | Nitrile-specifier protein 2                            | √ | √ |   |
| 35 | AT2G44490 | O64883 | PEN2       | Beta-glucosidase 26, peroxisomal                       | √ | √ |   |
| 36 | AT3G16390 | O04318 | NSP3       | Nitrile-specifier protein 3                            | √ | √ |   |
| 37 | AT3G16400 | Q9SDM9 | NSP1       | Nitrile-specifier protein 1                            | √ | √ |   |
| 38 | AT3G16410 | O04316 | NSP4       | Nitrile-specifier protein 4                            | √ | √ |   |
| 39 | AT3G44300 | P32962 | NIT2       | Nitrilase 2                                            | √ | √ |   |
| 40 | AT3G44310 | Q8LFU8 | NIT1       | Nitrilase 1                                            | √ | √ |   |
| 41 | AT3G44320 | P46010 | NIT3       | Nitrilase 3                                            | √ | √ |   |

|    |           |        |           |                                                             |   |   |   |
|----|-----------|--------|-----------|-------------------------------------------------------------|---|---|---|
| 42 | AT4G03050 | Q9ZTA1 | AOP3      | 2-oxoglutarate-dependent dioxygenase AOP3                   | √ | √ |   |
| 43 | AT4G03060 | Q9ZTA2 | AOP2      | Probable inactive 2-oxoglutarate-dependent dioxygenase AOP2 | √ | √ |   |
| 44 | AT4G30530 | Q9M0A7 | GGP1      | Gamma-glutamyl peptidase 1                                  | √ | √ |   |
| 45 | AT4G37400 | Q0WTF4 | CYP81F3   | Cytochrome P450 81F3                                        | √ | √ |   |
| 46 | AT4G37410 | Q9SZU1 | CYP81F4   | Cytochrome P450 81F4                                        | √ | √ |   |
| 47 | AT4G37430 | O65790 | CYP91A2   | Cytochrome P450 81F1                                        | √ | √ |   |
| 48 | AT5G22300 | P46011 | NIT4      | Bifunctional nitrilase/nitrile hydratase NIT4               | √ | √ |   |
| 49 | AT5G25980 | Q9C5C2 | TGG2      | Myrosinase 2                                                | √ | √ |   |
| 50 | AT5G26000 | P37702 | TGG1      | Myrosinase 1                                                | √ | √ |   |
| 51 | AT5G48180 | Q93XW5 | NSP5      | Nitrile-specifier protein 5                                 | √ | √ |   |
| 52 | AT5G57220 | Q9LVD6 | CYP81F2   | Cytochrome P450 81F2                                        | √ | √ |   |
| 53 | AT3G19710 | Q9LE06 | BCAT4     | Methionine aminotransferase BCAT4                           | √ |   | √ |
| 54 | AT1G12130 | Q9FWW3 | AT1G12130 | Flavin-containing monooxygenase FMO GS-OX-like 6            | √ |   |   |
| 55 | AT1G12160 | Q9FWW6 | AT1G12160 | Flavin-containing monooxygenase FMO GS-OX-like 1            | √ |   |   |
| 56 | AT1G03400 | Q94A78 | AT1G03400 | 1-aminocyclopropane-1-carboxylate oxidase homolog 4         |   | √ |   |
| 57 | AT1G03410 | Q43383 | 2A6       | 1-aminocyclopropane-1-carboxylate oxidase homolog 5         |   | √ |   |
| 58 | AT1G04350 | P93824 | AT1G04350 | 1-aminocyclopropane-1-carboxylate oxidase homolog 6         |   | √ |   |
| 59 | AT1G04380 | P93821 | AT1G04380 | 1-aminocyclopropane-1-carboxylate oxidase homolog 7         |   | √ |   |
| 60 | AT1G06620 | Q84MB3 | AT1G06620 | 1-aminocyclopropane-1-carboxylate oxidase homolog 1         |   | √ |   |

|    |           |        |           |                                                                          |  |   |  |
|----|-----------|--------|-----------|--------------------------------------------------------------------------|--|---|--|
| 61 | AT1G06640 | Q9C5K7 | AT1G06640 | 1-aminocyclopropane-1-carboxylate oxidase homolog 2                      |  | √ |  |
| 62 | AT1G06645 | F4IDQ2 | AT1G06645 | 2-oxoglutarate (2OG) and Fe (II)-dependent oxygenase superfamily protein |  | √ |  |
| 63 | AT1G06650 | Q8H1S4 | AT1G06650 | 1-aminocyclopropane-1-carboxylate oxidase homolog 3                      |  | √ |  |
| 64 | AT1G21110 | Q9LPU6 | IGMT3     | Indole glucosinolate O-methyltransferase 3                               |  | √ |  |
| 65 | AT1G21130 | Q9LPU8 | IGMT4     | Indole glucosinolate O-methyltransferase 4                               |  | √ |  |
| 66 | AT1G51490 | Q9C8K1 | BGLU36    | Putative myrosinase 6                                                    |  | √ |  |
| 67 | AT1G58265 | Q3E7Q8 | AT1G58265 | Cytochrome P450 superfamily protein                                      |  | √ |  |
| 68 | AT1G62600 | Q94BV5 | AT1G62600 | Flavin-containing monooxygenase FMO GS-OX-like 4                         |  | √ |  |
| 69 | AT1G66540 | Q0WVW6 | AT1G66540 | Cytochrome P450 superfamily protein                                      |  | √ |  |
| 70 | AT2G23190 | O22188 | CYP81D7   | Cytochrome P450, family 81, subfamily D, polypeptide 7                   |  | √ |  |
| 71 | AT2G23220 | O22185 | CYP81D6   | Cytochrome P450, family 81, subfamily D, polypeptide 6                   |  | √ |  |
| 72 | AT2G23960 | F4INN2 | GGP4      | Gamma-glutamyl peptidase 4                                               |  | √ |  |
| 73 | AT2G23970 | O82225 | GGP5      | Gamma-glutamyl peptidase 5                                               |  | √ |  |
| 74 | AT2G24850 | Q9SK47 | TAT3      | Probable aminotransferase TAT3                                           |  | √ |  |
| 75 | AT2G30830 | O80850 | AT2G30830 | 2-oxoglutarate                                                           |  | √ |  |
| 76 | AT2G30840 | O80851 | AT2G30840 | 2-oxoglutarate                                                           |  | √ |  |
| 77 | AT3G07720 | Q9S7W4 | F17A17.6  | AT3g07720/F17A17_6                                                       |  | √ |  |
| 78 | AT3G61400 | Q9M2C4 | AT3G61400 | 1-aminocyclopropane-1-carboxylate oxidase homolog 8                      |  | √ |  |
| 79 | AT4G28410 | F4JL94 | RSA1      | Tyrosine transaminase family protein                                     |  | √ |  |

|    |           |            |           |                                                        |  |   |  |
|----|-----------|------------|-----------|--------------------------------------------------------|--|---|--|
| 80 | AT4G28420 | Q67Y55     | AT4G28420 | Probable aminotransferase TAT1                         |  | √ |  |
| 81 | AT4G30540 | Q9M0A6     | GGP2      | Gamma-glutamyl peptidase 2                             |  | √ |  |
| 82 | AT4G30550 | Q9M0A5     | GGP3      | Gamma-glutamyl peptidase 3                             |  | √ |  |
| 83 | AT4G37320 | O23156     | CYP81D5   | Cytochrome P450, family 81, subfamily D, polypeptide 5 |  | √ |  |
| 84 | AT5G07800 | Q9FF12     | AT5G07800 | Flavin-containing monooxygenase FMO GS-OX-like 9       |  | √ |  |
| 85 | AT5G35917 | A0A178UFP3 | CYP79A3P  | CYP79A3P                                               |  | √ |  |
| 86 | AT5G35920 | Q9LTK9     | CYP79A4P  | Cytochrome P450-like                                   |  | √ |  |
| 87 | AT5G36220 | Q9FG65     | CYP81D1   | Cytochrome P450 81D1                                   |  | √ |  |
| 88 | AT5G43440 | Q9LSW7     | AT5G43440 | 1-aminocyclopropane-1-carboxylate oxidase homolog 9    |  | √ |  |
| 89 | AT5G43450 | Q9LSW6     | AT5G43450 | 1-aminocyclopropane-1-carboxylate oxidase homolog 10   |  | √ |  |
| 90 | AT5G48375 | Q3E8E5     | TGG3      | Putative myrosinase 3                                  |  | √ |  |
| 91 | AT5G53810 | Q9FHZ5     | MGN6.20   | Caffeic acid 3-O-methyltransferase-like protein        |  | √ |  |
| 92 | AT5G59530 | Q9LTH8     | AT5G59530 | 1-aminocyclopropane-1-carboxylate oxidase homolog 11   |  | √ |  |
| 93 | AT5G59540 | Q9LTH7     | AT5G59540 | 1-aminocyclopropane-1-carboxylate oxidase homolog 12   |  | √ |  |
| 94 | AT5G67310 | Q8GZ20     | CYP81G1   | At5g67310                                              |  | √ |  |
| 95 | AT1G12200 | Q9FWW9     | FMO       | Flavin-containing monooxygenase FMO GS-OX-like 2       |  | √ |  |
| 96 | AT1G15540 | Q9M9D9     | AT1G15540 | 2-oxoglutarate-dependent dioxygenase-like protein      |  | √ |  |
| 97 | AT1G28030 | Q9C7F0     | AT1G28030 | 2-oxoglutarate                                         |  | √ |  |
| 98 | AT1G31180 | Q9SA14     | IMDH3     | 3-isopropylmalate dehydrogenase 3, chloroplastic       |  | √ |  |

|     |           |        |           |                                                                        |  |   |   |
|-----|-----------|--------|-----------|------------------------------------------------------------------------|--|---|---|
| 99  | AT1G52790 | Q9C939 | AT1G52790 | 2-oxoglutarate (2OG and Fe II)-dependent oxygenase superfamily protein |  | √ |   |
| 100 | AT1G52800 | Q9C938 | AT1G52800 | 2-oxoglutarate (2OG and Fe II)-dependent oxygenase superfamily protein |  | √ |   |
| 101 | AT1G52810 | Q9C937 | AT1G52810 | 2-oxoglutarate (2OG and Fe II)-dependent oxygenase superfamily protein |  | √ |   |
| 102 | AT1G52820 | Q9C936 | AT1G52820 | 2-oxoglutarate (2OG and Fe II)-dependent oxygenase superfamily protein |  | √ |   |
| 103 | AT1G62580 | Q9SXD9 | NOGC1     | Flavin-containing monooxygenase FMO GS-OX-like 7                       |  | √ |   |
| 104 | AT1G62620 | Q9SXD5 | AT1G62620 | Flavin-containing monooxygenase FMO GS-OX-like 3                       |  | √ |   |
| 105 | AT1G63340 | Q9C8T8 | AT1G63340 | Putative flavin-containing monooxygenase FMO GS-OX-like 10             |  | √ |   |
| 106 | AT1G63370 | Q9C8U0 | AT1G63370 | Flavin-containing monooxygenase FMO GS-OX-like 5                       |  | √ |   |
| 107 | AT1G63390 | Q9SH25 | AT1G63390 | Putative flavin-containing monooxygenase FMO GS-OX-like 11             |  | √ |   |
| 108 | AT1G77530 | Q9CAQ3 | AT1G77530 | O-methyltransferase family protein                                     |  | √ |   |
| 109 | AT1G80320 | Q9C972 | AT1G80320 | 2-oxoglutarate                                                         |  | √ |   |
| 110 | AT1G80560 | P93832 | IMDH2     | 3-isopropylmalate dehydrogenase 2, chloroplastic                       |  | √ |   |
| 111 | AT4G03070 | Q9ZTA3 | AOP1      | Probable 2-oxoglutarate-dependent dioxygenase AOP1                     |  | √ |   |
| 112 | AT5G37170 | F4K5W7 | MJG14.10  | O-methyltransferase family protein                                     |  | √ |   |
| 113 | AT5G61290 | Q9FLK4 | AT5G61290 | Flavin-containing monooxygenase FMO GS-OX-like 8                       |  | √ |   |
| 114 | AT1G10060 | Q93Y32 | BCAT1     | Branched-chain-amino-acid aminotransferase 1, mitochondrial            |  |   | √ |

|     |           |        |       |                                                                   |  |  |   |
|-----|-----------|--------|-------|-------------------------------------------------------------------|--|--|---|
| 115 | AT1G10070 | Q9M439 | BCAT2 | Branched-chain-amino-acid<br>aminotransferase 2,<br>chloroplastic |  |  | √ |
| 116 | AT5G65780 | Q9FYA6 | BCAT5 | Branched-chain-amino-acid<br>aminotransferase 5,<br>chloroplastic |  |  | √ |
