# Supplementary material for: Identification of Potential Genes Encoding Protein Transporters in Arabidopsis thaliana Glucosinolate (GSL) Metabolism
Source: MDPI journal article supplement (doi:10.3390/life12030326), 2022-02-22
Supplement: s1 [file s1]

**Supplementary Table S2.** List of potential GSL transporters based on gene expression pattern with known GSL genes and the biological processes involved.

| No. | Gene name               | Synonym   | UniProt ID | AGI ID    | Type of gene              | Protein localization                                                                           | Protein name                                                              |
|-----|-------------------------|-----------|------------|-----------|---------------------------|------------------------------------------------------------------------------------------------|---------------------------------------------------------------------------|
| 1   | ESL1 <sup>LT</sup>      | SUGTL2    | Q94KE0     | At1g08920 | Potential GSL transporter | Vacuole; a transporter for monosaccharides                                                     | Sugar transporter ESL1 (Protein EARLY-RESPONSIVE TO DEHYDRATION 6-LIKE 1) |
| 2   | AtPNC2 <sup>LT</sup>    | PNC2      | Q8VZS0     | At5g27520 | Potential GSL transporter | Peroxisome; involved in fatty acid beta-oxidation during early stage of postgerminative growth | Peroxisomal adenine nucleotide carrier 2                                  |
| 3   | AtRAB2B <sup>LT</sup>   | AtRABB1A  | O23561     | At4g17160 | Potential GSL transporter | Mitochondrion peroxisome                                                                       | Ras-related protein RABB1a                                                |
| 4   | TAAC <sup>LT</sup>      | At5g01500 | Q9M024     | At5g01500 | Potential GSL transporter | Plastid; involved in providing ATP during thylakoid biogenesis and turnover                    | Thylakoid ATP/ADP carrier                                                 |
| 5   | TRP3 <sup>L</sup>       | TSA1      | Q42529     | At3g54640 | Potential GSL gene        | Plastid; catalyzes the conversion of indole-3-glycerolphosphate to indole                      | Tryptophan synthase alpha chain                                           |
| 6   | AERD2 <sup>LT</sup>     | ERD2      | P35402     | At1g29330 | Potential GSL transporter | Golgi; similar in sequence to animal and yeast endoplasmic reticulum retention signal receptor | ER lumen protein retaining receptor family protein                        |
| 7   | VHA-E3 <sup>LT</sup>    | At1g64200 | P0CAN7     | At1g64200 | Potential GSL transporter | Vacuole                                                                                        | Vacuolar H <sup>+</sup> -ATPase subunit E isoform 3                       |
| 8   | At5g02170 <sup>LT</sup> | AVT1E     | Q8LPF4     | At5g02170 | Potential GSL transporter | Plasma membrane; transmembrane amino acid transporter family protein                           | Amino acid transporter AVT1E                                              |

|    |                        |           |        |           |                                 |                                                                                                                                                      |                                                                                                       |
|----|------------------------|-----------|--------|-----------|---------------------------------|------------------------------------------------------------------------------------------------------------------------------------------------------|-------------------------------------------------------------------------------------------------------|
| 9  | LTPG6 <sup>L</sup>     | At1g55260 | F4I082 | At1g55260 | Potential<br>GSL<br>transporter | Cytosol                                                                                                                                              | Bifunctional<br>inhibitor/lipid-transfer<br>protein/seed storage<br>2S albumin<br>superfamily protein |
| 10 | AST68 <sup>LT</sup>    | SULTR2;1  | O04722 | At5g10180 | Potential<br>GSL<br>transporter | Plasma<br>membrane                                                                                                                                   | Sulfate transporter<br>2;1                                                                            |
| 11 | PILS3 <sup>LT</sup>    | At1g76520 | Q9C9K5 | At1g76520 | Potential<br>GSL<br>transporter | Vacuole                                                                                                                                              | Auxin efflux carrier<br>family protein                                                                |
| 12 | AtDTX1 <sup>LT</sup>   | DTX1      | Q9SIA5 | At2g04040 | Potential<br>GSL<br>transporter | Plasma<br>membrane;<br>Detoxifying efflux<br>carrier for plant-<br>derived antibiotics<br>and other toxic<br>compounds,<br>including CD2+            | Protein<br>DETOXIFICATION 1                                                                           |
| 13 | ABCG40 <sup>LT</sup>   | PDR12     | Q9M9E1 | At1g15520 | Potential<br>GSL<br>transporter | Plasma<br>membrane;<br>involved in ABA<br>transport and<br>resistance to lead                                                                        | ABC transporter G<br>family member 40                                                                 |
| 14 | AtBET11 <sup>LT</sup>  | AtBS14A   | Q9M2J9 | At3g58170 | Potential<br>GSL<br>transporter | Golgi; suppresses<br>the temperature-<br>sensitive growth<br>defect in sft1-1<br>yeast cells                                                         | BET1P/SFT1P-like<br>protein 14A                                                                       |
| 15 | AMT1;4 <sup>LT</sup>   | At4g28700 | Q9SVT8 | At4g28700 | Potential<br>GSL<br>transporter | Plasma<br>membrane                                                                                                                                   | Ammonium<br>transporter 1;4                                                                           |
| 16 | AtMEMB12 <sup>LT</sup> | MEMB12    | Q9FK28 | At5g50440 | Potential<br>GSL<br>transporter | Golgi                                                                                                                                                | Membrin 12                                                                                            |
| 17 | MPT2 <sup>LT</sup>     | PHT3;2    | Q9M2Z8 | At3g48850 | Potential<br>GSL<br>transporter | Mitochondrion                                                                                                                                        | Mitochondrial<br>phosphate carrier<br>protein 2                                                       |
| 18 | CDI3 <sup>LT</sup>     | SLAC1     | Q9LD83 | At1g12480 | Potential<br>GSL<br>transporter | Plasma<br>membrane;<br>expressed in<br>guard cells that<br>plays a role in<br>regulating cellular<br>ion homeostasis<br>and S-type anion<br>currents | Guard cell S-type<br>anion channel SLAC1                                                              |
| 19 | At5g38160 <sup>L</sup> | MXA21.18  | Q9FF40 | At5g38160 | Potential<br>GSL<br>transporter | Extracellular                                                                                                                                        | Bifunctional<br>inhibitor/lipid-transfer<br>protein/seed storage<br>2S albumin<br>superfamily protein |

|    |                   |           |        |           |                       |                                                                                                                  |                                            |
|----|-------------------|-----------|--------|-----------|-----------------------|------------------------------------------------------------------------------------------------------------------|--------------------------------------------|
| 20 | AFH3 <sup>L</sup> | FH3       | F4JJE8 | At4g15200 | Potential<br>GSL gene | Extracellular; actin<br>nucleation factor<br>that directs the<br>formation of actin<br>cables in pollen<br>tubes | Formin 3                                   |
| 21 | SDP6 <sup>L</sup> | At3g10370 | Q9SS48 | At3g10370 | Potential<br>GSL gene | Mitochondrion;<br>possibly involved<br>in storage lipid<br>catabolism and<br>glycerol<br>assimilation            | Glycerol-3-phosphate<br>dehydrogenase SDP6 |

<sup>L</sup> genes that are involved in localisation, <sup>T</sup> genes that are involved in transport
