# Supplementary material for: Identification of Potential Genes Encoding Protein Transporters in Arabidopsis thaliana Glucosinolate (GSL) Metabolism
Source: MDPI journal article supplement (doi:10.3390/life12030326), 2022-02-22
Supplement: s1 [file s1]

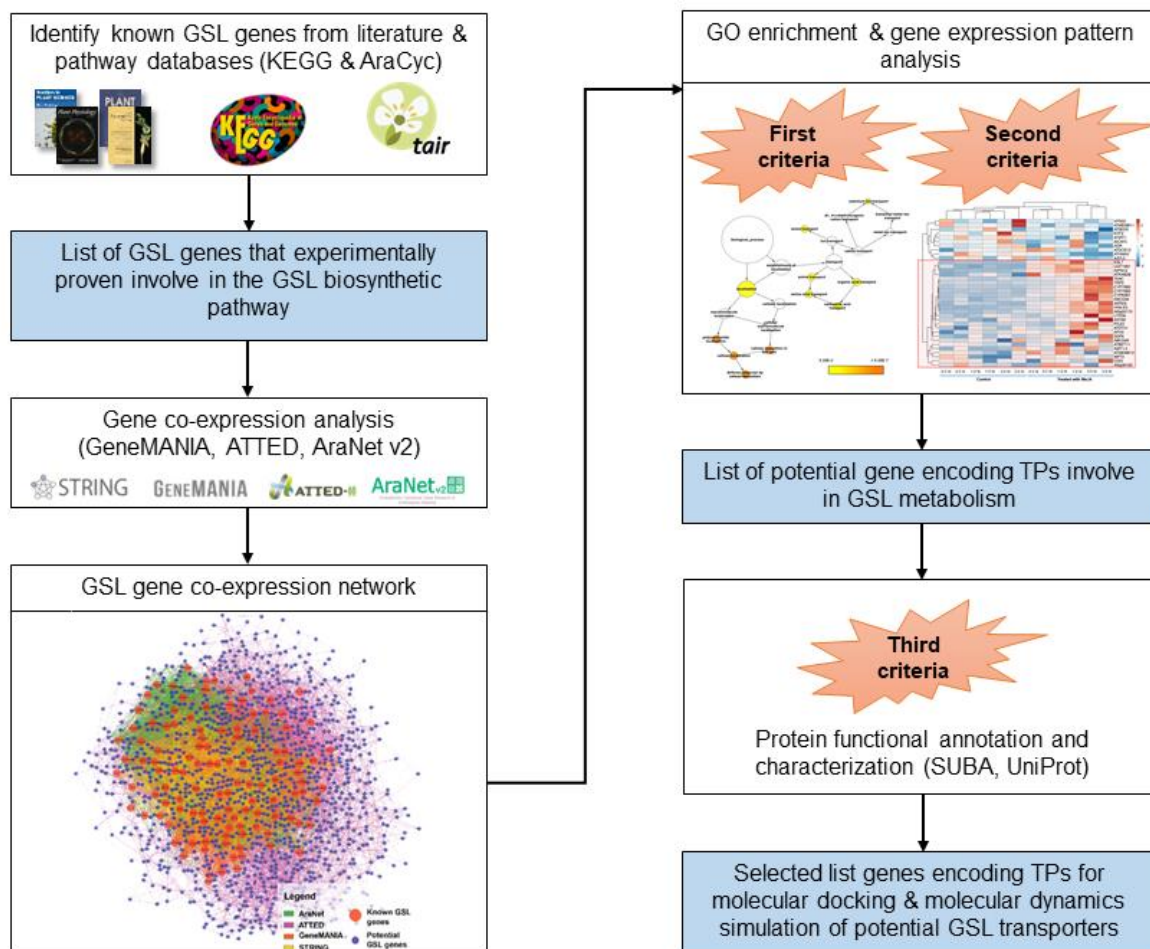

**Supplementary Figure S1.** The step-by-step procedure was designed in this study to identify potential genes encoding GSL TPs.
